# Supplementary material for: Singlet–triplet energy gap in a cyclophane-based organic diradical with parallel exchange coupling pathways
Source: Royal Society of Chemistry journal article supplement (doi:10.1039/b001273o), 2000-01-01
Supplement: b001273o.doc [file b001273o.doc]

### Supplementary Information

**Singlet-Triplet Energy Gap in a Cyclophane-Based Organic Diradical**

**with Parallel Exchange Coupling Pathways**

Andrzej Rajca*, Suchada Rajca, Jirawat Wongsriratanakul

Department of Chemistry, University of Nebraska, Lincoln, NE 68588-0304.

Diether **4**:*t*-BuLi (4.60 mL of a 1.7 M solution in pentane, 7.82 mmol) was added to a solution of **3** (0.901 g, 1.85 mmol) in THF (72 mL) in a heavy-wall Schlenk vessel at -78 oC. After 2 h, the reaction mixture was warmed up to -20 oC for 10 min and, then, recooled to -78 oC. Following addition of ZnCl2 (4.30 mL of 0.96 M solution in ether, 4.13 mmol), the reaction mixture was allowed to attain ambient temperature for 2 h. In an argon-filled Vacuum Atmospheres glovebox, Pd(PPh3)4 (0.087 g, 0.075 mmol) and **3** (0.901 g, 1.85 mmol) were added to the reaction mixture. Subsequently, the reaction mixture was heated at 100 oC for 2 days. After the usual aqueous workup with ether, column chromatography (TLC grade silica gel, 1.5 - 2.5 % ether in hexane), and treatment with ether/MeOH, two isomers of **4** were isolated as white powders: the less polar isomer (0.154 g, 13 %) and the more polar isomer (0.172 g, 14 %). The less polar isomer: 1H NMR (500 MHz, C6D6, 1H-1H COSY cross-peaks in the aromatic region): 8.422 (s, 4 H, 7.565, 7.294), 7.565 (d, *J* = 8, 4 H, 8.422, 7.294(weak), 7.150), 7.565 (d, *J* = 8, 4 H, 7.173), 7.294 (d, *J* = 7, 4 H, 8.422, 7.565(weak), 7.150), 7.173 (d, *J* = 8, 4 H, 7.565), 7.150 (t, *J* = 7, 4 H, 8.422(weak), 7.565, 7.294), 3.018 (s, 6 H), 1.117 (s, 18 H). Anal. Cald for C48H48O2: C, 87.76; H, 7.36. Found: C, 87.67; H, 7.36. The more polar isomer: 1H NMR (500 MHz, C6D6, 1H-1H COSY cross-peaks in aromatic region): 8.448 (bs, 4 H, 7.580, 7.299), 7.650 (d, *J* = 8, 4 H, 7.190), 7.580 (bd, *J* = 8, 4 H, 8.448, 7.299(weak), 7.157), 7.299 (bd, *J* = 7, 4 H, 8.448, 7.580(weak), 7.157), 7.190 (d, *J* = 9, 4 H, 7.650), 7.157 (t, *J* = 8, 4 H, 7.580, 7.299), 2.957 (s, 6 H), 1.116 (s, 18 H).
